# Supplementary material for: Evaluation of iLead, a generic implementation leadership intervention: mixed-method preintervention–postintervention design
Source: PubMed Central journal article supplement — BMJ Open. 2020 Jan 12;10(1):e033227. doi: 10.1136/bmjopen-2019-033227 (PMC7045007; doi:10.1136/bmjopen-2019-033227), 2020-01-12
Supplement: bmjopen-2019-033227supp001.pdf [file bmjopen-2019-033227supp001.pdf]

## Intervention content

| <b>Workshops 1&amp;2<br/>Implementation and leadership<br/>2 x 3 hours</b>                                                                                                                                                                                                   | <b>Workshop 3<br/>Communicating the implementation 3 hours</b>                                                                                                                                                                                                        | <b>Workshop 4<br/>Supporting the implementation<br/>3 hours</b>                                                                                                                                                                                                                            | <b>Workshop 5<br/>Sustaining the implementation<br/>3 hours</b>                                                                                                                                                                                                     |
|------------------------------------------------------------------------------------------------------------------------------------------------------------------------------------------------------------------------------------------------------------------------------|-----------------------------------------------------------------------------------------------------------------------------------------------------------------------------------------------------------------------------------------------------------------------|--------------------------------------------------------------------------------------------------------------------------------------------------------------------------------------------------------------------------------------------------------------------------------------------|---------------------------------------------------------------------------------------------------------------------------------------------------------------------------------------------------------------------------------------------------------------------|
| Aim:<br>use an evidence-based model on implementation and connect leadership to it as an implementation strategy                                                                                                                                                             | Aim: inspirational and motivational communication of the implementation                                                                                                                                                                                               | Aim: understand and handle employee reactions to the implementation                                                                                                                                                                                                                        | Aim: planning for sustainability of the implementation                                                                                                                                                                                                              |
| Introduction to the implementation model based on the Behavioral Change Wheel<br><br>Applying the model to a current implementation<br><br>Introduction to the full range leadership model<br><br>Receiving the 180 degree on feedback report on general and implementation- | Follow-up on the between-workshop assignment<br><br>Action plan finalization – identifying, pin-pointing and analyzing manager implementation leadership behaviors to enable and facilitate employee target behaviors<br><br>Introduction to inspirational motivation | Follow-up on the between-workshop assignment<br><br>Repetition of the steps in the implementation model<br><br>Understanding employee reactions and resistance to implementation<br><br>Training of possible implementation leadership behaviors to overcome resistance and to support the | Follow-up on the between-workshop assignment<br><br>Apply the implementation model to a fictive example<br><br>Action plan follow-up and revision focusing on evaluation and follow up.<br><br>Introduction to continuously evaluating the implementation progress. |

|                                                                                                                                                                                                                                                                                                                                                                                                                                                   |                                                                                                                                                                                                                                                                                                             |                                                                                                                                                                                                                                                                                                                                                                                                                                                |                                                                                                                                                                |
|---------------------------------------------------------------------------------------------------------------------------------------------------------------------------------------------------------------------------------------------------------------------------------------------------------------------------------------------------------------------------------------------------------------------------------------------------|-------------------------------------------------------------------------------------------------------------------------------------------------------------------------------------------------------------------------------------------------------------------------------------------------------------|------------------------------------------------------------------------------------------------------------------------------------------------------------------------------------------------------------------------------------------------------------------------------------------------------------------------------------------------------------------------------------------------------------------------------------------------|----------------------------------------------------------------------------------------------------------------------------------------------------------------|
| <p>specific leadership behaviors, understanding and analyzing feedback on implementation leadership</p> <p>Action plan initiation – identifying, pin-pointing and analyzing employee target behaviors of the implementation</p> <p>Assignment to work with between Workshops 1/2 and 3: discuss the results of the feedback report with the employees &amp; discuss one's own prerequisites for implementation leadership with senior manager</p> | <p>Training of inspirational and motivational communication in relation to the action plan</p> <p>Assignment to work with between Workshops 3 and 4: Present the action plan to the senior manager as well as employees, that will be involved in the implementation. Act in line with the action plan.</p> | <p>implementation</p> <p>Introduction to contingent reward, intellectual stimulation and individual consideration</p> <p>Revision of the action plan</p> <p>Assignment to work with between Workshops 4 and 5: Act according to the action plan, evaluate the progress related to the implementation. Testing contingent reward, intellectual stimulation and individual consideration. Identify potential obstacles with the action plan.</p> | <p>Focus on intervention sustainment – measuring and monitoring change, conducting adaptations</p> <p>Transform the action plan into a sustainability plan</p> |
|---------------------------------------------------------------------------------------------------------------------------------------------------------------------------------------------------------------------------------------------------------------------------------------------------------------------------------------------------------------------------------------------------------------------------------------------------|-------------------------------------------------------------------------------------------------------------------------------------------------------------------------------------------------------------------------------------------------------------------------------------------------------------|------------------------------------------------------------------------------------------------------------------------------------------------------------------------------------------------------------------------------------------------------------------------------------------------------------------------------------------------------------------------------------------------------------------------------------------------|----------------------------------------------------------------------------------------------------------------------------------------------------------------|

Core components that are used in all workshops:

|                                                                                  |
|----------------------------------------------------------------------------------|
| Work with one's own implementation case                                          |
| Short expert lectures presenting state-of the art research                       |
| Individual as well as reflection in small groups                                 |
| Role-play                                                                        |
| Individual feedback from employees, i.e., 180-degree feedback in feedback report |
| Feedback from fellow training participants                                       |
| Feedback from workshop leaders                                                   |

|                                     |
|-------------------------------------|
| Work between the workshops          |
| Booster email between the workshops |
